# Supplementary material
Source: Research Square preprint supplement (doi:10.21203/rs.3.rs-9118039/v1)
Supplement: Supplementary file 1 [file 4d30aff14b8b795f1f86727a.docx]

# Tables & Legends:

**Table 1. Physiological Inter‑Ocular Asymmetry (n = 200 patients)**

| **Metric** | **Mean ± SD** | **Median (IQR)** | **95th percentile cutoff** | **Prevalence >2 mm**  **(%, 95% CI)** |
| --- | --- | --- | --- | --- |
| Δ AP diameter (mm) | 0.96 ± 1.1 | 1.0 (0–2) | 4.0 | 5% (95% CI ~2–8) |
| Δ Width (mm) | 0.42 ± 0.6 | 0.0 (0–1) | 2.0 | 3% (95% CI ~1–6) |
| Δ Area (mm²) | 6.2 ± 7.8 | 3.9 (0–9) | 23.7 | 4% (95% CI ~2–7) |

***Δ = absolute side-to-side difference.***

**Table 2. Intra-Reader Reliability (Repeat Subset, n = 50 per reader)**

| **Metric** | **Inter-Observer ICC (95% CI)** | **Intra-Reader ICC (95% CI)*** | **Bland-Altman 95% Limits of Agreement** |
| --- | --- | --- | --- |
| **AP Diameter (mm)** | 0.91 (0.88–0.94) | 0.91 (0.85–0.95) | −1.9 to +2.1 mm |
| **Transverse Width (mm)** | 0.89 (0.86–0.92) | 0.89 (0.82–0.93) | −1.6 to +1.4 mm |
| **Cross-Sectional Area (mm²)** | 0.93 (0.90–0.95) | 0.93 (0.87–0.96) | −13.4 to +11.3 mm² |

****ICC = intraclass correlation coefficient. *Pooled intra-reader estimates from Readers 1 & 2.***
